# Supplementary material for: Meaningful Social Inclusion and Mental Well-Being Among Autistic Adolescents and Emerging Adults: Protocol for a Community-Based Mixed Methods Study
Source: PubMed Central journal article supplement (PMC10979331; doi:10.2196/52658), 2024-03-14
Supplement: resprot_v13i1e52658_app1.pdf [file resprot_v13i1e52658_app1.pdf]

# Review Form 1 (Subgrantee)

**Project Lead:** DJ McMaughan

**Project Title:** *Impact of social inclusion on mental wellbeing among autistic adolescents and emerging adults*

**Organization:** Oklahoma State University

| Issue | Area                             | Description of Issue |
|-------|----------------------------------|----------------------|
|       | Human Subjects                   |                      |
|       | Vertebrate Animals               |                      |
|       | Recombinant DNA                  |                      |
|       | Radioisotopes                    |                      |
|       | Narcotics and<br>Dangerous Drugs |                      |
|       | Biological Hazards               |                      |

**Comments:**

Evaluation Criteria

**1. Significance**

**Strengths:**

*The current study addresses mental health concerns of autistic people. Rates of co-occurring mental health issues among autistic adolescents and emerging adults are as high as 82% (double that of people without autism). Current estimates suggest that 1 in 44 children in the U.S. are diagnosed with autism. The proposed study will provide important preliminary data for developing training and interventions focused on social inclusion. Results will be integrated into the Autism Foundation of Oklahoma's training and awareness programs.*

**Weaknesses:**

*None noted.*

**2. Approach**

**Strengths:**

*The propose to conduct sharing sessions to co-create and then deploy a survey of social inclusion using two samples of people from the autistic community: 10 community partners (autistic adults and stakeholders who will help create the survey) and 200 participants (100 autistic adolescents and emerging adults and 100 caregivers). In the first (qualitative) phase, they will conduct sharing sessions with members of the autistic community to co-create: 1) a working definition of social inclusion and 2) adaptation of a survey of social inclusion. In the second (quantitative) phase, they will deploy the survey in the autistic community to gather data on level of social inclusion and mental wellbeing. Finally, they will conduct a process evaluation of the research processes. Findings from each phase will be integrated using triangulation with the autistic community. Participants will be recruited online through the Autism Foundation of Oklahoma, Autistic Adults of Oklahoma, AutismStillwater.org, AutismOKC.org, tribal organizations, and state department health services caseworkers. I appreciate their positionality statements.*

**Weaknesses:**

*I am curious about the inclusion of only one measure of well-being. Wouldn't it be valuable to include other specific measures (if validated in the target population), such as anxiety and depression, or even measures related to self-harm given the elevated rates in that population?*

**3. Innovation****Strengths:**

*The proposed study is one of few community-engaged projects with the autistic community, a best practice particularly when working with communities that have been marginalized. No study has integrated both aspects of social inclusion, included autistic voices, and focused on mental wellbeing. It also changes the focus from problem-fixing (autistic people need to change to fit into society) to possibility-creating (we can create a community inclusive of autistic people). Finally, most studies of autistic individuals focus on children.*

**Weaknesses:**

*They state that "no research exists that examines social inclusion and mental wellbeing" (pg 1), but they must mean that no research like this exists for an autistic population since a quick pubmed search results in over a thousand articles.*

**4. Investigators****Strengths:**

*The research team is uniquely suited to conduct this type of research. The PI (Dr. McMaughan) is a neurodivergent, disabled scholar of disability, an expert on systems improvement for disabled people. They are experienced in survey creation and data analysis, qualitative and mixed-methods research, and community engagement. They are a member of Autistic Adults of Oklahoma, and co-chair of the Autism Foundation of Oklahoma's Public Health and Safety Committee. They have recruited community participants for the development of the survey. The PI and collaborators have worked together in the past, including studies of psychiatric hospitalizations and autistic adolescents and emerging adults. All members of the team appear to have extensive personal and professional backgrounds in this topic. They will leverage their community contacts for recruitment.*

**Weaknesses:**

*None noted.*

**5. Environment****Strengths:**

*OSU-Stillwater has adequate resources to support the proposed project, including Qualtrics licenses and statistical software, as well as research support services.*

**Weaknesses:**

*None noted.*

Response to Previous Reviewers (if applicable)

*The authors revised the proposal substantially from the earlier submission. They addressed previous concerns adequately (whenever still relevant).*

Overall Evaluation

*The proposed mixed methods study addresses social inclusion and mental health among autistic adolescents and emerging adults. They propose to develop a new conceptualization of social inclusion that includes both interpersonal relationships and community participation for autistic people and then to assess the impact of social inclusion on the mental well-being. They will use sharing sessions to co-create a survey of social inclusion, and then will use the survey within two samples of people from the autistic community: 10 community partners (autistic adults and stakeholders who will help create the survey) and 200 participants (100 autistic adolescents and emerging adults and 100 caregivers). At the end, they will conduct a process evaluation of the research processes. Throughout, they will work closely with the autistic community. The study's innovation is that it will be the first to integrate two aspects of social inclusion into one measure, include autistic voices, and focus on mental wellbeing. The research team is uniquely well-suited to conduct this type of research, with extensive lived experiences that complement their professional expertise in survey research methodology, qualitative methods, and community engagement. They also have numerous networking connections to facilitate recruitment. No major weaknesses were noted.*

# Review Form 2 (Subgrantee)

**Project Lead:** *DJ McMaughan*

**Project Title:** *Impact of social inclusion on mental wellbeing among autistic adolescents and emerging adults*

**Organization:** *Oklahoma State University*

| Issue | Area | Description of Issue |
|-------|------|----------------------|
|-------|------|----------------------|

|  |                   |  |
|--|-------------------|--|
|  | Human<br>Subjects |  |
|--|-------------------|--|

|  |                       |  |
|--|-----------------------|--|
|  | Vertebrate<br>Animals |  |
|--|-----------------------|--|

|  |                    |  |
|--|--------------------|--|
|  | Recombinant<br>DNA |  |
|--|--------------------|--|

|  |               |  |
|--|---------------|--|
|  | Radioisotopes |  |
|--|---------------|--|

|  |                                     |  |
|--|-------------------------------------|--|
|  | Narcotics and<br>Dangerous<br>Drugs |  |
|--|-------------------------------------|--|

|  |                       |  |
|--|-----------------------|--|
|  | Biological<br>Hazards |  |
|--|-----------------------|--|

**Comments:** *no concerns*

## Evaluation Criteria

### 1. Significance

#### Strengths:

*Autistic adolescents and young adults has high rates of mental illness and self-harm (including death). The proposal suggests that social inclusion is a factor in mental well-being in this population. The overall objective of this proposal is to define meaningful social inclusion and then to measure two domains of social inclusion and assess their association with mental health. Results could provide important preliminary data for new interventions as well as incorporation into training programs. The long-term goal is to improve social inclusion factors and so improve mental well-being.*

#### Weaknesses:

*none noted*

### 2. Approach

**Strengths:**

*The research strategy is nicely written and sufficiently detailed.*

*The research methods are straightforward and measures are clearly defined.*

*Analysis plans are appropriate. with justified sample sizes.*

*The discussion of potential pitfalls is excellent.*

*The timeline appears feasible.*

**Weaknesses:**

*A more thorough discussion of previous research supporting the link between social inclusion and mental well-being would strengthen the premise of the study.*

*It is unclear how the caregivers data will be used (Aim 2). How much of these data independent of that provided by the 100 autistic individuals? How do the two data sources combine for analysis?*

*Information about the internal and external validity of the questionnaires to be used is not provided.*

**3. Innovation****Strengths:**

*The focus on adolescent and emerging adult autistic individuals is innovative; most research focuses on children.*

*The participation of the autistic community in defining social inclusion, and the extent of engagement with the autistic community, are innovative.*

*Focusing on social inclusion, and attempting an operational definition of it, is innovative.*

**Weaknesses:**

*none noted*

**4. Investigators****Strengths:**

*Dr. McMaughan will well-qualified to lead this study. She has the academic and research background necessary as well as the lived experience. She has conducted research in social isolation previously, as well as in mental health and with autistic children.*

*Dr. Criss brings relevant experience to the research team. He has the appropriate expertise to support and assist with this study.*

*Community partners and consultants have been identified.*

**Weaknesses:**

*none noted*

**5. Environment****Strengths:**

*Excellent resources and facilities*

**Weaknesses:**

*none noted*

**Response to Previous Reviewers (if applicable)****Overall Evaluation**

*This is an innovative proposal from a highly qualified PI and team that seeks to investigate the association between social inclusion and mental health in adolescent and emerging adult autistic individuals. The environment and resources are excellent and the team has excellent access to the target population. The first aim deals with generating a definition of social inclusion via focus groups. The second aim is a quantitative exploration of social isolation domains and mental health. The methods are appropriate and sample sizes appear reasonable. The major weakness is the underdeveloped argument for the link between social inclusion and mental health. The minor weaknesses can be addressed by clarification of the use of caregiver data and psychometric details of the surveys. This is overall a potentially impactful study that is well designed and highly feasible.*

# Review Form 3 (Subgrantee)

**Project Lead:**

**Project Title:**

**Organization:**

**Issue**

**Description of Issue**

Human  
Subjects

Vertebrate  
Animals

Recombinant  
DNA

Radioisotopes

Narcotics and  
Dangerous  
Drugs

Biological  
Hazards

Comments:

**Evaluation Criteria**

1. Significance
2. Approach
3. Innovation
4. Investigators
5. Environment

**Response to Previous Reviewers (if applicable)**

**Overall Evaluation**

# Review Panel Summary (Subgrantee)

**Project Lead:** DJ McMaughan

**Project Title:** *Impact of social inclusion on mental wellbeing among autistic adolescents and emerging adults* **Panel:**

**Organization:** Oklahoma State University

**Approved:** Yes

## Reasons for Disapproval

## Approved Budget

|        |          |        |          |        |          |              |                  |
|--------|----------|--------|----------|--------|----------|--------------|------------------|
| Year 1 | \$43,971 | Year 2 | \$38,724 | Year 3 | \$39,785 | <b>Total</b> | <b>\$122,480</b> |
|--------|----------|--------|----------|--------|----------|--------------|------------------|

**Evidence of Submission to a National Funding Organization Included (previous recipients only):**

## Overlapping funding

## Reason for Budget Adjustment (if applicable)

## Summary Comments from Review Session

*The current proposal addresses mental health in autistic adolescents and young adults. This population experiences high rates of co-occurring mental health issues including self-harm. Social inclusion is posited to be a factor in mental health of autistic individuals; the proposed study aims to define and measure social inclusion and assess association with mental health. These preliminary data could be used to develop meaningful interventions and improve training with results being integrated into the Autism Foundation's training and awareness programs. The research strategy is detailed and well-designed. Sharing sessions will be used to develop a survey to measure social inclusion, including the components of interpersonal relationships and community participation; pilot testing will be following by the deployment of the survey as well as other measures. This sample of 100 autistic individuals and 100 caregivers will provide the association data. The research is highly significant, the environment is excellent, and the investigators are uniquely qualified to conduct the research. Weaknesses were minor, including a lack of clarity about exactly how caregiver data would be used, (especially for the subset of caregivers linked to a respondent) and why only one measure of well-being was included. The resubmission was responsive to prior critique.*
